# Supplementary material
Source: PubMed Central journal article supplement (PMC4967043)

Figure S1

polySUMO + polySIM

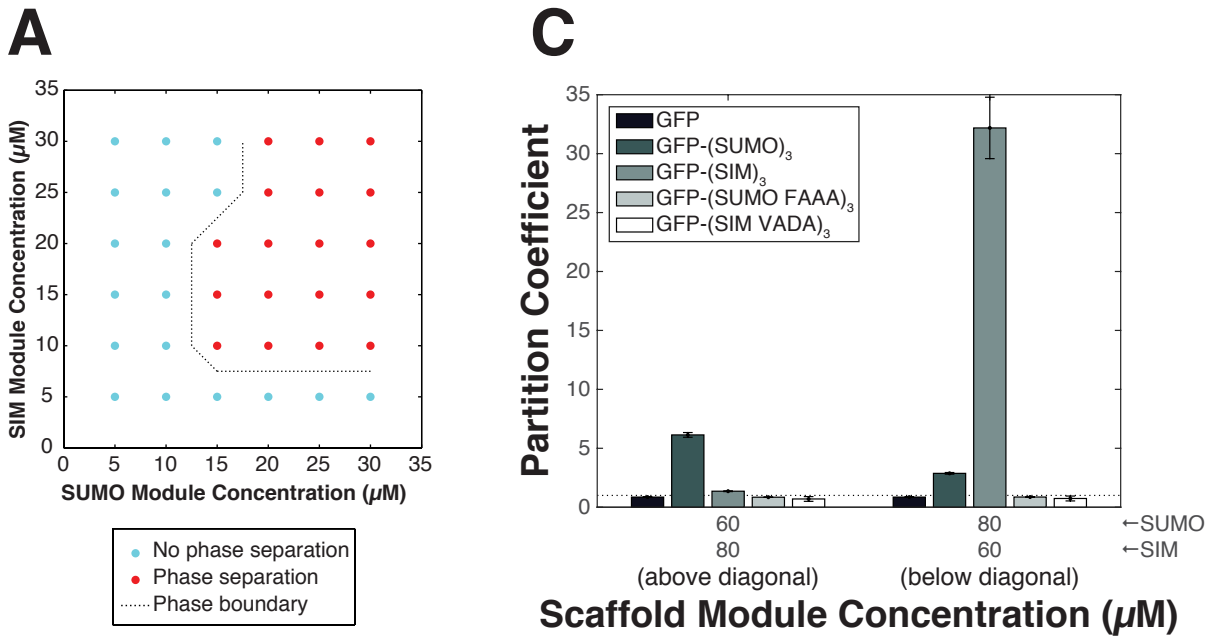

**B**

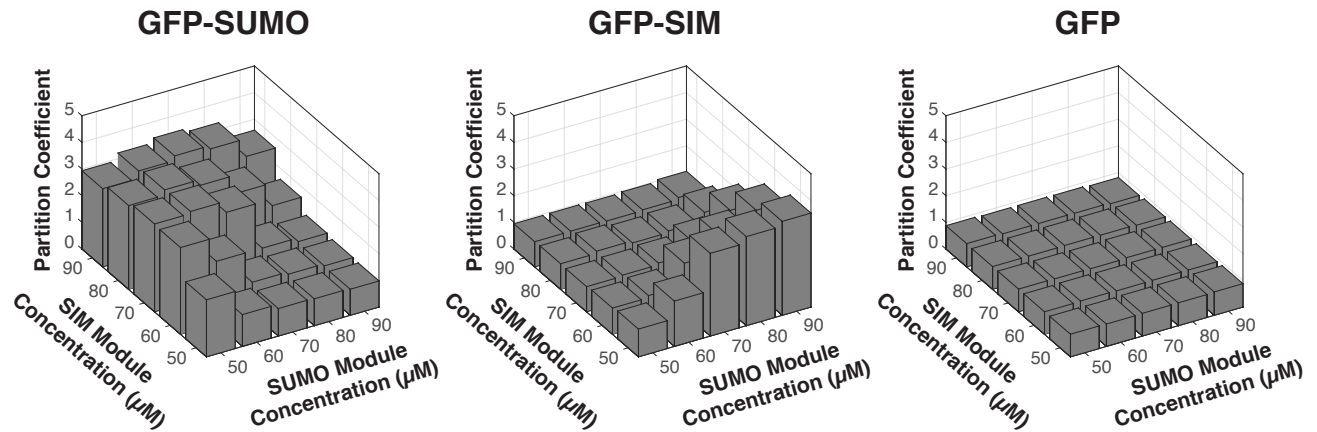

**D**

polyPRM + polySH3

polyUCUCU + PTB

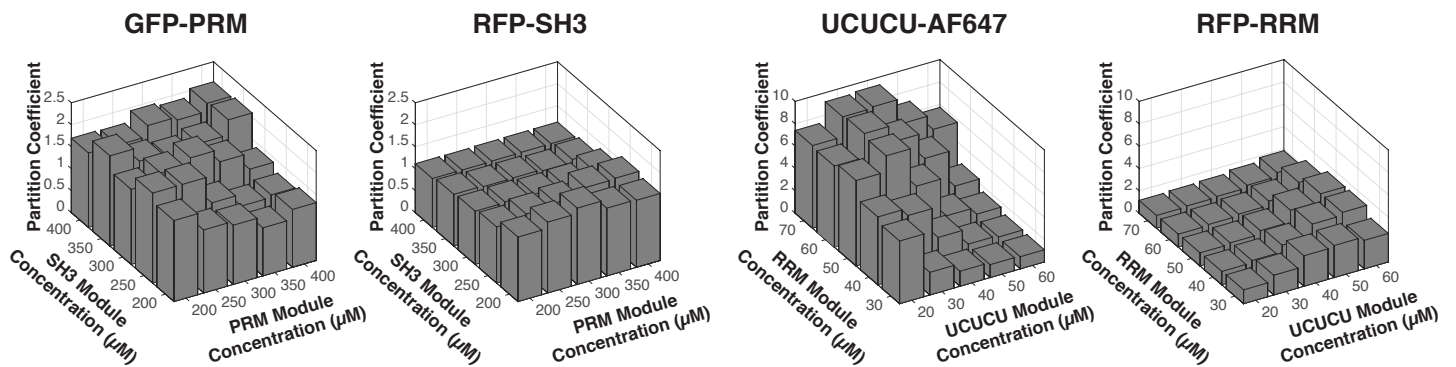

Supplement: NIHMS793472-supplement-2.pdf [file NIHMS793472-supplement-2.pdf]

Figure S5

polySUMO + polySIM

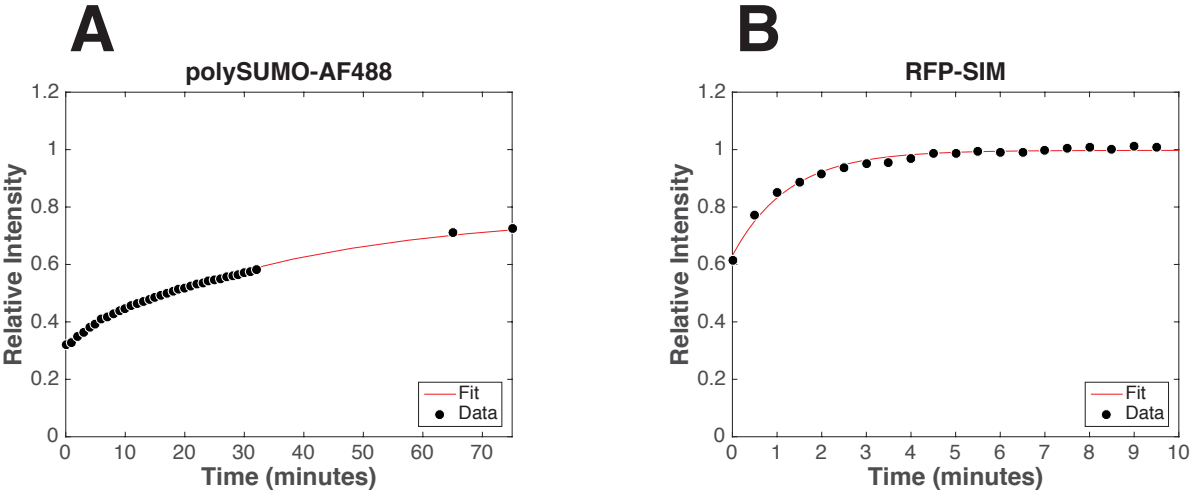

Supplement: NIHMS793472-supplement-6.pdf [file NIHMS793472-supplement-6.pdf]
